# Supplementary material for: Molecular characteristics of the refractory organic matter in the anaerobic and aerobic digestates of sewage sludge
Source: Royal Society of Chemistry journal article supplement (doi:10.1039/c8ra05009k), 2018-01-01
Supplement: c8ra05009k1.pdf [file c8ra05009k1.pdf]

## Supplied Materials

Molecular characteristics of refractory organic matter in anaerobic and aerobic digestion of sewage sludge

Xiaowei Li <sup>1</sup>, Xiaofang Yan <sup>1</sup>, Bin Dong <sup>2, 3 \*</sup>, Xiaohu Dai <sup>2\*</sup>, Liangliang Yu <sup>4</sup>, Guoji Ding <sup>1</sup>, Fang Yu <sup>1</sup>, John Zhou <sup>5</sup>

<sup>1</sup> School of Environmental and Chemical Engineering, Institute for the Conservation of Cultural Heritage, Shanghai University, Shanghai 200444, People R. China

<sup>2</sup> State Key Laboratory of Pollution Control and Resources Reuse, National Engineering Research Center for Urban Pollution Control, College of Environmental Science and Engineering, Tongji University, Shanghai 200092, People R. China

<sup>3</sup> School of Civil Engineering and Architecture, Ningbo Institute of Technology, Zhejiang University, Ningbo 315000, People R. China

<sup>4</sup> School of Life Sciences Shanghai University, Shanghai University, Shanghai 200444, People R. China

<sup>5</sup> School of Civil and Environmental Engineering, University of Technology Sydney, 15 Broadway, Sydney, NSW 2007, Australia

Corresponding author: [lixiaowei419@shu.edu.cn](mailto:lixiaowei419@shu.edu.cn) (Dong B.);

[daixiaohu@tongji.edu.cn](mailto:daixiaohu@tongji.edu.cn) (Dai X.)

The Number of Pages:5

The Number of Tables:3

The Number of Figures: 3

Table S1 Characteristics of wastewater treatment plants (WWTPs) investigated

| Parameter | Treatment capacity<br>(10 <sup>4</sup> t · d <sup>-1</sup> ) | Drainage system | Servicing population<br>(10 <sup>4</sup> ) | Servicing area<br>(km <sup>2</sup> ) | Proportion of industrial wastewater in influent (%) | Secondary biological treatment process <sup>a</sup>   | Discharge Standard of WWTP effluent <sup>b</sup> |
|-----------|--------------------------------------------------------------|-----------------|--------------------------------------------|--------------------------------------|-----------------------------------------------------|-------------------------------------------------------|--------------------------------------------------|
| WWTP      | 30                                                           | NK              | 54                                         | 27.5                                 | NK                                                  | Phase I, A <sup>2</sup> /O; phase II, oxidation ditch | First level A                                    |

Table S2 Organic matter contents of raw sludge (RS), mesophilic anaerobic digestate (AnD) and aerobic digestate (AoD)

| Organic content      | RS        | AnD       | AoD        |
|----------------------|-----------|-----------|------------|
| VS (mg/g dry weight) | 634.3±0.7 | 478.3±0.2 | 501.2±7.4  |
| C (mg/g dry weight)  | 321.3±1.6 | 226.8±4.0 | 245.9±45.7 |
| N (mg/g dry weight)  | 47.8±0.2  | 35.5±0.09 | 39.8±9.2   |
| H (mg/g dry weight)  | 55.3±0.3  | 43.3±0.9  | 47.2±8.7   |
| S (mg/g dry weight)  | 9.4±0.1   | 15.2±0.3  | 13.3±2.6   |
| C/N ratio            | 7.84      | 7.45      | 7.21       |
| C/H ratio            | 0.48      | 0.44      | 0.43       |

Table S3 Main absorption bands of the region and corresponding assignments of FTIR

| Main absorption bands (cm <sup>-1</sup> ) | corresponding assignments                                                                                                  |
|-------------------------------------------|----------------------------------------------------------------------------------------------------------------------------|
| 1610-1700                                 | aromatic C=C, C=O stretching of amide groups (amide I band), quinonic C=O and/or C=O of H-bonded conjugated ketones        |
| 1530-1590                                 | N-H deformation and C=N stretching of amides (amide II band)                                                               |
| 1370-1420                                 | O-H deformation and C-O stretching of phenolic OH, antisymmetric stretching of COO <sup>-</sup> groups, and/or C-H bending |
| 1000-1170                                 | C-O stretching of polysaccharide-like substances                                                                           |

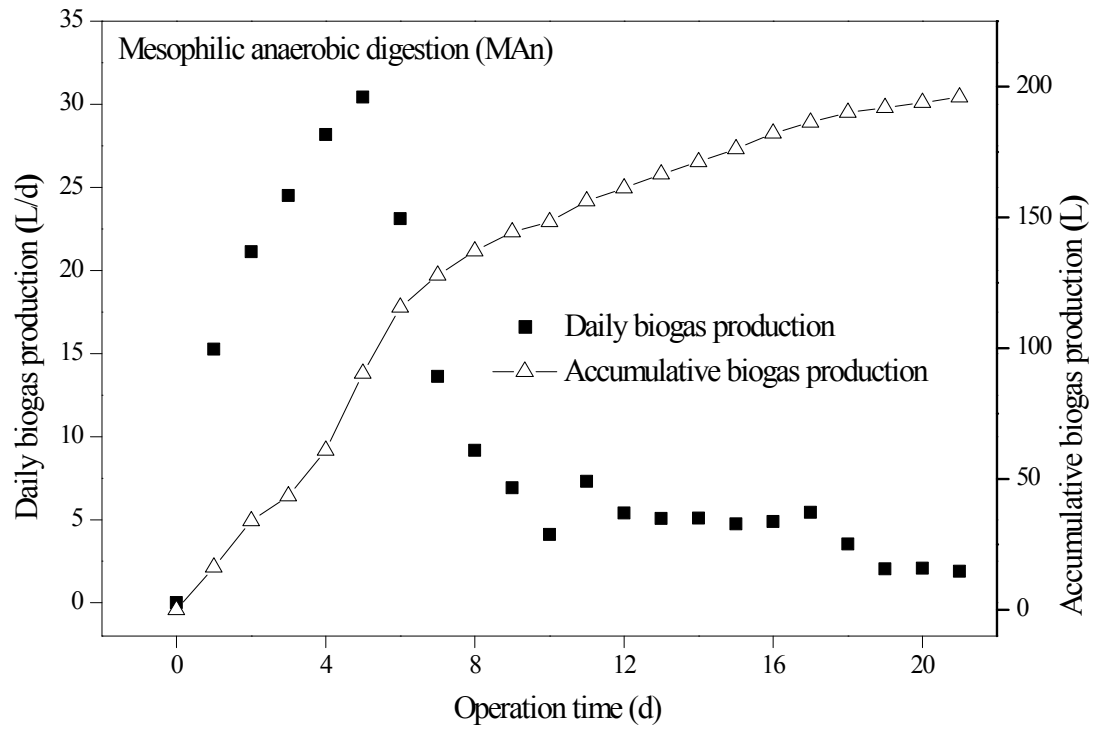

Figure S1 Biogas production during mesophilic anaerobic digestion of dewatered sewage sludge

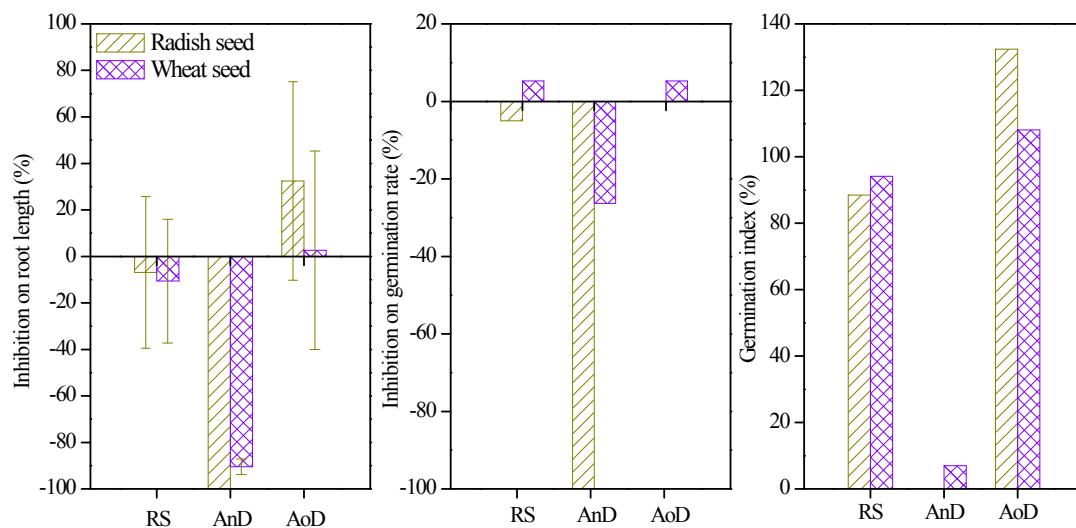

Figure S2 Phytotoxicity test of the RS, AnD and AoD samples using two types of seeds (Radish and wheat). RS, raw sludge; AnD, mesophilic anaerobic digestate; AoD, mesophilic aerobic digestate

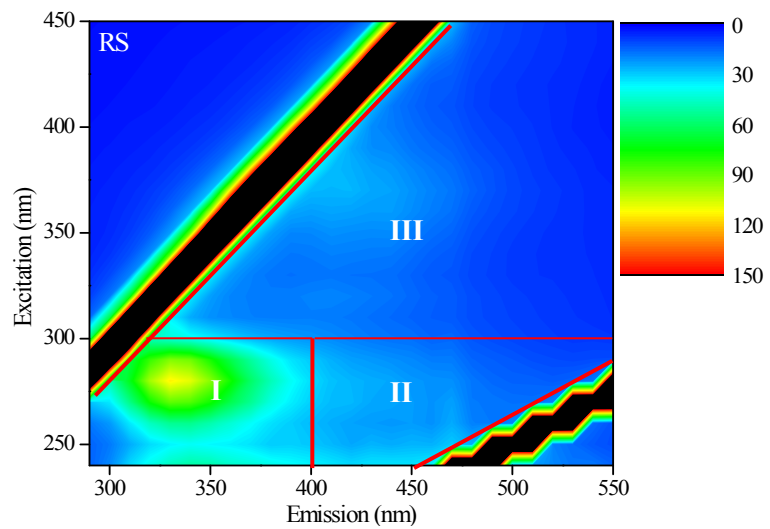

Figure S3 Fluorescence regionalization integration for spectra interpretation and quantification
